# Supplementary material for: Saccharomyces cerevisiae Yeast-Based Supplementation as a Galactagogue in Breastfeeding Women? A Review of Evidence from Animal and Human Studies
Source: MDPI journal article supplement (doi:10.3390/nu13030727), 2021-02-25
Supplement: s1 [file s1]

**Table S1** Effectiveness of *Saccharomyces cerevisiae* yeast-based supplement (SCYS) on milk production in animals.

| References          | Study animal                                 | Study design                                                                                                                          | Daily dose                                | Administration                                                                                                                                                                                                                   | Daily milk yields or litter weight                                                                                                                                         | Other benefits                                                                                                                                                                                                                                                                                                                                               |
|---------------------|----------------------------------------------|---------------------------------------------------------------------------------------------------------------------------------------|-------------------------------------------|----------------------------------------------------------------------------------------------------------------------------------------------------------------------------------------------------------------------------------|----------------------------------------------------------------------------------------------------------------------------------------------------------------------------|--------------------------------------------------------------------------------------------------------------------------------------------------------------------------------------------------------------------------------------------------------------------------------------------------------------------------------------------------------------|
| Ruminant animals    |                                              |                                                                                                                                       |                                           |                                                                                                                                                                                                                                  |                                                                                                                                                                            |                                                                                                                                                                                                                                                                                                                                                              |
| Dobicki et al. [1]  | Cow, Holstein-Friesian<br>N = 75             | No information. Daily milk yield were determined once a month at the Milk Analysis Laboratory.                                        | *SCYS: 200 g/animal<br>*YCWP: 20 g/animal | Supplementation from 7 days prior to the estimated calving date to 100 days of lactation. SCYS group: dried yeast (Leiber BT) containing 40% yeast cells. YCWP group: MOS (Biolex MB 40) containing 40-50% MOS and beta-glucans. | Milk yields at 100 day:<br>SCYS: 26.780 ± 4.459 <sup>A</sup> kg<br>MOS: 25.993 ± 5.707 <sup>A</sup> kg<br>Control: 23.810 ± 4.765 <sup>B</sup> kg<br><sup>A,B</sup> P≤0.01 | Milk SCC was significantly lower (P≤0.01) in SCYS group.<br>The number of bacteria in the rumen fluid was significantly higher (P≤0.01) in SCYS and MOS groups (n = 24).                                                                                                                                                                                     |
| Kuczaj et al. [2]   | Cow, Holstein-Friesian (Red-white)<br>N = 50 | Animals randomly assigned to 2 groups. Daily milk yield was conducted once a month (official control).                                | *SCYS: 200 g/animal                       | Supplementation from 3 weeks before calving to 100 days lactation with added SCYS (Leiber BT) containing 40% yeast cells.                                                                                                        | Milk yields at 100 day:<br>SCYS: 29.84 ± 4.80 kg<br>Control: 28.60 ± 4.82 kg<br>P> 0.05                                                                                    | Milk fat and dry matter were significantly higher (P< 0.05) in SCYS group in the first month.<br>Maternal blood urea was significantly higher (P≤0.01) and blood albumins and globulins were significantly lower (P≤0.01 and ≤0.05 respectively) in SCYS group (n = 16).<br>Milk SCC was significantly lower (P<0.05) in SCYS group in the first two months. |
| Westland et al. [3] | Cow, Holstein cross Friesian<br>N = 80       | 80 cows randomly assigned to 2 groups prepartum with colostrum obtained from 59 cows. colostrum collected by Fullwood® mobile milking | *MOS: 2 g/animal                          | Supplementation prepartum from drying off until point of calving over 6 months. No information of the MOS.                                                                                                                       | Colostrum yields immediately post-calving:<br>MOS: 7.5 ± 0.69 kg<br>Control: 5.6 ± 0.43 kg<br>P = 0.02                                                                     | No significant differences of IgG in colostrum between two groups.                                                                                                                                                                                                                                                                                           |

|                       |                                           |                                                                                                                                                                                                                                             |                       |                                                                                                                                                                        |                                                                                                                                                                                                                           |                                                                                                                                                                                                                                                                                                                                                                                                                                                                      |
|-----------------------|-------------------------------------------|---------------------------------------------------------------------------------------------------------------------------------------------------------------------------------------------------------------------------------------------|-----------------------|------------------------------------------------------------------------------------------------------------------------------------------------------------------------|---------------------------------------------------------------------------------------------------------------------------------------------------------------------------------------------------------------------------|----------------------------------------------------------------------------------------------------------------------------------------------------------------------------------------------------------------------------------------------------------------------------------------------------------------------------------------------------------------------------------------------------------------------------------------------------------------------|
| Aung et al. [4]       | Cow, Holstein<br>N = 32                   | machine<br>(Fullwood Ltd, Ellesmere, Shropshire, UK) within 40 minutes of calving.                                                                                                                                                          | *YCWP:<br>10 g/animal | Ten-week experiment with first 2 weeks as adaptation period and last 8 weeks as experimental period, with added YCWP (SafMannan; Phileo, Lesaffre Animal Care, France) | Milk yields:<br>Control:<br>Early lactation: 25.52±1.96 kg<br>Mid lactation: 24.48±1.73 kg<br>YCWP:<br>Early lactation: 28.97±1.54 kg<br>Mid lactation: 22.83±1.82<br>P = 0.627 (treatment)<br>P = 0.117 (treatment × LP) | In early lactation groups, maternal blood total cholesterol and non-esterified fatty acid/total cholesterol ratio was significantly lower in treatment group.<br>In early lactation groups, 4% fat corrected milk and energy corrected milk was higher (p = 0.063 and 0.065 respectively) in treatment group.                                                                                                                                                        |
|                       |                                           | 2×2 factorial arrangement (2 treatments × 2 LP)<br>LP = lactation period, early lactation means day in milk <120, and mid lactation means >120<br>Cows were milked twice a day and milk yields were automatically recorded at each milking. |                       |                                                                                                                                                                        |                                                                                                                                                                                                                           |                                                                                                                                                                                                                                                                                                                                                                                                                                                                      |
| Milewski & Sobiec [5] | Ewe, Polish long-wool Kamieniec<br>N = 26 | Animals divided into 2 equal groups. No information of randomisation and blind assessment. Daily milk yield was determined by the results of milking after                                                                                  | *SCYS:<br>30 g/animal | Supplementation for 70 days lactation period after birth, with added SCYS (Inter Yeast®, Krośniewice).                                                                 | Milk yields:<br>Day 28:<br>SCYS: 1895.00 ml<br>Control: 1603.31 ml<br>P< 0.01<br>Day 70:<br>SCYS: 1121.54 ml<br>Control: 970.77 ml<br>P< 0.05                                                                             | On day 28 blood erythrocytes and leukocytes, blood glucose and Na <sup>+</sup> (P≤0.05), blood haemoglobin and haematocrit and blood Cl <sup>-</sup> (P≤0.01) were significantly higher and blood creatinine was significantly lower (P≤0.01) in SCYS group.<br>On day 70 blood leukocyte, blood glucose and Na <sup>+</sup> (P≤0.05), blood Cl <sup>-</sup> (P≤0.01) were significantly higher and blood creatinine was significantly lower (P≤0.01) in SCYS group. |

|                     |                                                    |                                                                                                                                                                                                                                           |                                                                                                                                                                                  |                                                                                                                                                                                                                                   |                                                                                                                                                                                                                                                                                                              |                                                                                                                                                                                                                                                                                                                                                                                                                                                                                                                                                                                                                                     |
|---------------------|----------------------------------------------------|-------------------------------------------------------------------------------------------------------------------------------------------------------------------------------------------------------------------------------------------|----------------------------------------------------------------------------------------------------------------------------------------------------------------------------------|-----------------------------------------------------------------------------------------------------------------------------------------------------------------------------------------------------------------------------------|--------------------------------------------------------------------------------------------------------------------------------------------------------------------------------------------------------------------------------------------------------------------------------------------------------------|-------------------------------------------------------------------------------------------------------------------------------------------------------------------------------------------------------------------------------------------------------------------------------------------------------------------------------------------------------------------------------------------------------------------------------------------------------------------------------------------------------------------------------------------------------------------------------------------------------------------------------------|
| Zabek et al.<br>[6] | Ewe,<br>Polish<br>long-wool<br>Kamieniec<br>N = 26 | an injection of<br>oxytocin.<br>Animals<br>divided into 2<br>equal groups.<br>No<br>information of<br>randomisation<br>and blind<br>assessment.<br>No<br>information of<br>milking.                                                       | *Beta-<br>glucan:<br>0.18g/anim<br>al (adding<br>beta-glucan<br>as 3 g/kg of<br>CJ mixture<br>at the daily<br>dose of 0.6<br>kg/animal).<br>Assume<br>feeding at<br>equal level. | Supplementation from<br>birth to 70 days of<br>lactation with added<br>beta-glucan (Biolex®-<br>Beta S Leiber GmbH)<br>containing 70% of beta-<br>1,3/1,6-D-glucan not<br>changing the chemical<br>composition of the feed.       | Milk yields:<br>Day 28:<br>Control: 1596.15 ± 181.90 ml<br>Glucan: 1812.31 ± 231.31 ml<br>P< 0.01<br>Day 70:<br>Control: 998.46 ± 187.69 ml<br>Glucan: 1138.69 ± 155.46 ml<br>P< 0.01                                                                                                                        | Milk SCC was significantly lower (P≤0.05) in<br>glucan group on day 28. Milk fat was<br>significantly higher (P≤0.01) in glucan group on<br>both day 28 and day 70. Milk protein was<br>significantly higher (P≤0.05) in glucan group on<br>day 70.<br>Blood gamma globulin, lysozyme activity,<br>respiratory burst activity, potential killing<br>activity, MTT-ConA (RI) and MTT- LPS (RI)<br>were significantly higher (p≤0.01) in glucan<br>group on both day 28 and day 70.                                                                                                                                                   |
| Zabek et al.<br>[7] | Ewes,<br>Kamieniec<br>N = 39                       | Animals<br>divided into 3<br>equal groups.<br>No<br>information of<br>randomisation<br>and blind<br>assessment.<br>Daily milk<br>yield was<br>determined by<br>the results of<br>morning<br>milking after<br>an injection of<br>oxytocin. | *SCYS:<br>15 g/animal                                                                                                                                                            | Experimental group I<br>supplementation from<br>late pregnancy to 70<br>days of lactation,<br>experimental group II<br>supplementation from<br>birth to 70 days of<br>lactation.<br>Supplementation with<br>SCYS (Inter Yeast S). | Milk yields:<br>Day 28<br>Group I: 1868.46±268.88 <sup>a</sup> ml<br>Group II: 1927.54±439.58 <sup>a</sup> ml<br>Control: 1603±164.89 <sup>b</sup> ml<br>Day 70<br>Group I: 1078.46±168.22 ml<br>Group II: 1164.61±286.84 <sup>a</sup> ml<br>Control: 970.77±158.87 <sup>b</sup> ml<br><sup>a,b</sup> P<0.05 | Milk SCC was significantly lower in<br>supplementation groups on day 28 and day 70<br>(P≤0.01 and ≤0.05 respectively).<br>Higher value of blood gamma globulin,<br>lysozyme activity, respiratory burst activity,<br>MTT-ConA (RI) and MTT- LPS (RI) were<br>observed in group I on both day 28 and day 70,<br>compared to the other two groups (P≤0.01).<br>Ceruloplasmin activity and potential killing<br>activity in group I were significantly higher<br>(P≤0.01) than control on both days. All these<br>parameters except for gamma globulin in group<br>II were significantly higher (P≤0.01) than control<br>on both days. |
| Zabek et al.<br>[7] | Ewes,<br>Kamieniec<br>N = 26                       | Animals<br>divided into 2<br>equal groups.<br>No<br>information of<br>randomisation                                                                                                                                                       | *SCYS:<br>15 g/animal                                                                                                                                                            | Supplementation from<br>birth to 70 days of<br>lactation with added<br>SCYS (Inter Yeast S).                                                                                                                                      | Milk yields:<br>Day 28<br>SCYS: 1860.15±320.46 ml<br>Control: 1596.15±181.90 ml<br>P<0.05<br>Day 70<br>SCYS: 1277.92±175.47 ml                                                                                                                                                                               | Milk SCC was significantly lower (P≤0.05) in<br>SCYS group on day 28.<br>Blood gamma globulin, lysozyme activity and<br>MTT-ConA (RI) (P≤0.01) as well as respiratory<br>burst activity, potential killing activity and<br>MTT- LPS (RI) (p≤0.05) were significantly higher<br>in SCYS group on day 28.                                                                                                                                                                                                                                                                                                                             |

|                    |                                  |                                                                                                                                                                                                                            |                                                 |                                                                                                                                                                                                                          |                                                                                                                                                                                                                                                                                                                                 |                                                                                                                                                                                                                                                                                                                                                                                                    |
|--------------------|----------------------------------|----------------------------------------------------------------------------------------------------------------------------------------------------------------------------------------------------------------------------|-------------------------------------------------|--------------------------------------------------------------------------------------------------------------------------------------------------------------------------------------------------------------------------|---------------------------------------------------------------------------------------------------------------------------------------------------------------------------------------------------------------------------------------------------------------------------------------------------------------------------------|----------------------------------------------------------------------------------------------------------------------------------------------------------------------------------------------------------------------------------------------------------------------------------------------------------------------------------------------------------------------------------------------------|
|                    |                                  | and blind assessment. Daily milk yield was determined by the results of morning milking after an injection of oxytocin.                                                                                                    |                                                 |                                                                                                                                                                                                                          | Control: 998.46±187.69 ml<br>P<0.01                                                                                                                                                                                                                                                                                             | All these 6 parameters were significantly higher (P≤0.01) in SCYS group on day 70.                                                                                                                                                                                                                                                                                                                 |
| Zaleska et al. [8] | Ewe, Polish long-wool<br>N = 120 | Animals divided into 3 equal groups. Milk yield evaluated from 8 randomly selected ewes nursing singleton in each group. Daily milk yield was determined by the results of morning milking after an injection of oxytocin. | *SCYS: 50 g/kg feed<br>Beta-glucan: 3 g/kg feed | Supplementation 3-week preparation for tugging + from lambing to 70 days lactation. SCYS group: dried yeast (Inter Yeast®)<br>Glucan group (G): beta-glucan (Biolex® Beta-S) containing over 70% (1,3)-(1,6)-β-D-glucan. | Milk yields:<br>Day 28<br>SCYS: 1850.00±231.02 <sup>a</sup> ml<br>G: 1795.00±211.59 <sup>a</sup> ml<br>Control: 1567.50±172.69 <sup>b</sup> ml<br>Day 70<br>SCYS: 1373.50±212.86 <sup>A</sup> ml<br>G: 1268.50±70.05 <sup>A</sup> ml<br>Control: 1055.00±155.56 <sup>B</sup> ml<br><sup>a,b</sup> P<0.05, <sup>A,B</sup> P<0.01 | On day 28 milk fat and dry matter were significantly higher (P≤0.01) in glucan group and milk dry matter was significantly higher(P≤0.01) in SCYS group, compared to the control group.<br>On day 70 milk fat and dry matter were significantly higher (P≤0.01 and ≤0.05 respectively) in glucan group and milk fat was significantly higher(P≤0.05) in SCYS group, compared to the control group. |



|                            |                                                                                 |                 |                                                                                                                                |                                                                                                                                                                                                                                                                |                                                                                                                                                                                                                                                                                                                                                                                                                                                                                                                              |                                                                                                                                                                                                                                                                                                                                                                                                                                                                                                                                                                                                                                                               |
|----------------------------|---------------------------------------------------------------------------------|-----------------|--------------------------------------------------------------------------------------------------------------------------------|----------------------------------------------------------------------------------------------------------------------------------------------------------------------------------------------------------------------------------------------------------------|------------------------------------------------------------------------------------------------------------------------------------------------------------------------------------------------------------------------------------------------------------------------------------------------------------------------------------------------------------------------------------------------------------------------------------------------------------------------------------------------------------------------------|---------------------------------------------------------------------------------------------------------------------------------------------------------------------------------------------------------------------------------------------------------------------------------------------------------------------------------------------------------------------------------------------------------------------------------------------------------------------------------------------------------------------------------------------------------------------------------------------------------------------------------------------------------------|
| Czech et al. [11]          | Sow, Polish Landrace breed N = 32 in Experiment 1 and Experiment 2 respectively | No information. | *MOS: 8 g/animal                                                                                                               | Supplementation 4 weeks prepartum and 4 weeks postpartum with added MOS (Bio-MOS, Alltech, USA).<br>The diet in Experiment 1 contained 40% wheat; Experiment 2 contained 40% triticale.                                                                        | Litter weight in Experiment 1<br>At birth:<br>MOS: 22.29 kg<br>Control: 19.43 kg<br>P = 0.032<br>Day 14:<br>MOS: 59.67 kg<br>Control: 48.17 kg<br>P = 0.016<br>Day 28:<br>MOS: 103.77 kg<br>Control: 84.69 kg<br>P = 0.013<br>No difference in Experiment 2                                                                                                                                                                                                                                                                  | In both experiments, MOS groups had significantly lower piglet losses compared to the control groups (P≤0.05).<br>In Experiment 1, MOS group had significantly higher contents of colostrum IgG and IgM from 1 hour to 48 hours after birth (P≤0.05).<br>In Experiment 2, MOS group had significantly higher content of colostrum IgG from 1 hour to 48 hours after birth (P≤0.05), and significantly higher content of colostrum IgM from 1 hour to 12 hours after birth (P≤0.05).<br>In both experiments, MOS group had significantly higher content of milk IgG at 21st day of age (P≤0.05).                                                               |
| Szuba-Trznadel et al. [12] | Sow, crossbred (Polish Large White × Polish Landrace) N = 40                    | No information. | *Beta-glucan: Experiment al group I: 100 ppm feed, Experiment al group II: 200 ppm feed, Experiment al group III: 300 ppm feed | Supplementation from day 80 of gestation to day 21 of lactation (weaning) with added purified (1,3)-(1,6)-β-D-glucan (Betamune®, 80% purity).<br>Piglets started supplementation from day 10 of lactation to the end of experiment with the same dose as sows. | Piglet body weight<br>Day 2:<br>Experimental I: 1.64 ± 0.23 kg<br>Experimental II: 1.66 ± 0.12 kg<br>Experimental III: 1.63 ± 0.12 kg<br>Control: 1.58 ± 0.25 kg<br>No significant difference.<br>Day 21:<br>Experimental I: 7.20 ± 0.70 kg<br>Experimental II: 6.98 ± 0.70 kg<br>Experimental III: 6.95 ± 0.67 kg<br>Control: 6.73 ± 0.80 kg<br>No significant difference.<br>Day 45:<br>Experimental I: 14.63 ± 0.58 kg<br>Experimental II: 15.11 ± 0.62 <sup>b</sup> kg<br>Experimental III: 15.05 ± 0.60 <sup>b</sup> kg | Milk whey γ-globulin was significantly higher (p<0.01) in Experimental I and Experimental II groups compared to control group on day 21.<br>Sow serum α-globulin was significantly higher (p<0.01) in Experimental II group compared to control group on day 2.<br>Sow serum γ-globulin was significantly higher (p<0.01) in Experimental II group compared to control group on day 21.<br>Piglet serum α-globulin was significantly higher (p<0.05) in all Experimental groups compared to control group on day 2.<br>Piglets in experimental groups had significantly lower (p<0.01) feed conversion ratio from day 21 to day 45 compared to control group. |

Control: 14.27 ± 0.62<sup>a</sup> kg  
<sup>a,b</sup> P<0.05

|                       |                                                                  |                                                                                                                                                                             |                                                                  |                                                                                                                                                                                                                                              |                                                                                                                                                |                                                                                                                                                                                                                                                                                                                                                                               |
|-----------------------|------------------------------------------------------------------|-----------------------------------------------------------------------------------------------------------------------------------------------------------------------------|------------------------------------------------------------------|----------------------------------------------------------------------------------------------------------------------------------------------------------------------------------------------------------------------------------------------|------------------------------------------------------------------------------------------------------------------------------------------------|-------------------------------------------------------------------------------------------------------------------------------------------------------------------------------------------------------------------------------------------------------------------------------------------------------------------------------------------------------------------------------|
| Graugnard et al. [13] | Sow, no information of breed<br>N = 218                          | Randomized complete block design<br>62 milk samples collected from individual sows from week 1 to week 4, 22 from control and 40 from treatment group                       | *MOS:<br>900 mg/kg feed                                          | Supplementation from day 100 of gestation to day 23 of lactation (weaning) with added MOS (Actigen™, Alltech Inc., Nicholasville, KY, USA)                                                                                                   | Litter weight<br>At birth:<br>MOS: 19.7 kg<br>Control: 19.1 kg<br>P = 0.2<br>Adjusted wean weight<br>MOS: 7.0 kg<br>Control: 7.0 kg<br>P = 1.0 | Milk protein, total solids less fat and IgG were significantly higher (p = 0.01, p = 0.03 and p = 0.03 respectively) in MOS group.<br>Intestinal gene expression in piglets from MOS group shown significantly higher (p<0.01) number of issue development, cell proliferation, cell growth and cell differentiation, as well as significantly lower (p<0.01) cell migration. |
| Duan et al. [14]      | Sow, crossbred (Large White × Yorkshire, 4 ± 1 parity)<br>N = 60 | Completely randomized design with a 2 × 2 factorial treatment arrangement (2 treatment × 2 animal groups). Colostrum and milk samples were collected from 6 sows per group. | *MOS:<br>Sow diet: 400 mg/kg feed<br>Piglet diet: 800 mg/kg feed | Supplementation from day 86 of gestation to day 20 of lactation (weaning) with added MOS (Actigen, Alltech Inc., Nicholasville, USA).<br>Piglets started supplementation from day 7 of lactation to the end of experiment with the same MOS. | Piglet body weight<br>At birth:<br>MOS: 1.56 kg<br>Control: 1.57 kg<br>P = 0.86<br>Weaning:<br>MOS: 6.10 kg<br>Control: 5.69 kg<br>P = 0.03    | Piglet serum IgA and IgG concentrations at weaning were significantly higher (p<0.01) in group of sow diet supplementing MOS.<br>Piglet serum complement 3, complement 4 and lysozyme were significantly higher (p<0.01, p = 0.05 and p<0.01 respectively) in group of sow diet supplementing MOS.                                                                            |

Other animals

|                   |                                           |                                     |                                                                                                                        |                                                                                                                                                                               |                                                                                                                                                                                                                                                                                |                                                                                                                                                                                                                                                                                                               |
|-------------------|-------------------------------------------|-------------------------------------|------------------------------------------------------------------------------------------------------------------------|-------------------------------------------------------------------------------------------------------------------------------------------------------------------------------|--------------------------------------------------------------------------------------------------------------------------------------------------------------------------------------------------------------------------------------------------------------------------------|---------------------------------------------------------------------------------------------------------------------------------------------------------------------------------------------------------------------------------------------------------------------------------------------------------------|
| Wu et. al<br>[15] | Doe,<br>New<br>Zealand<br>White<br>N = 30 | Completely<br>randomized<br>design. | *Beta-<br>glucan:<br>Experiment<br>al group I:<br>0.064% of<br>feed<br>Experiment<br>al group II:<br>0.128% of<br>feed | Supplementation from<br>day 14 of gestation to<br>day 28 of lactation<br>(weaning) with added<br>(1,3)-(1,6)- $\beta$ -D-glucan<br>(Allamond, Inc.)<br>containing 16% glucan. | Litter weight:<br>At birth:<br>Experimental I: 364 $\pm$ 32 g<br>Experimental II: 296 $\pm$ 46 g<br>Control: 319 $\pm$ 41 g<br>At weaning:<br>Experimental I: 2245 $\pm$ 334 g<br>Experimental II: 1960 $\pm$ 409 g<br>Control: 2205 $\pm$ 421 g<br>No significant difference. | Doe serum IgM was significantly ( $p < 0.05$ ) higher<br>in experimental group I on lactation day 28.<br>Does serum IgG was significantly ( $p < 0.05$ )<br>higher in experimental group II on lactation day<br>3 and significantly ( $p < 0.05$ ) higher in both<br>experimental groups on lactation day 28. |
|-------------------|-------------------------------------------|-------------------------------------|------------------------------------------------------------------------------------------------------------------------|-------------------------------------------------------------------------------------------------------------------------------------------------------------------------------|--------------------------------------------------------------------------------------------------------------------------------------------------------------------------------------------------------------------------------------------------------------------------------|---------------------------------------------------------------------------------------------------------------------------------------------------------------------------------------------------------------------------------------------------------------------------------------------------------------|

MOS: manna oligosaccharides, SCC: somatic cell count, YCWP: yeast cell wall product.

\* Added in addition to the feeds.

\*\* Added as the substitute for soybeans as protein source.

## References:

1. Dobicki, A.; Preś, J.; Zachwieja, A.; Kwaśnicki, R. *Saccharomyces cerevisiae* preparations in the feeding of cows and their effect on milk yield and composition as well as rumen microorganisms. *Electron J Pol Agric Univ* **2006**, *9*, 48.
2. Kuczaj, M.; Dobicki, A.; Pres, J.; Zachwieja, A.; Jakus, W. An influence of dried brewer's yeast (*Saccharomyces cerevisiae*) addition before and after calving on yield and chemical composition of milk and biochemical indices of blood in the first 100 days of lactation. *Electron J Pol Agric Univ* **2010**, *13*, 12-art 12.
3. Westland, A.; Martin, R.; White, R.; Martin, J.H. Mannan oligosaccharide prepartum supplementation: effects on dairy cow colostrum quality and quantity. *Animal* **2017**, *11*, 1779-1782.
4. Aung, M.; Ohtsuka, H.; Izumi, K. Effect of yeast cell wall supplementation on production performances and blood biochemical indices of dairy cows in different lactation periods. *Vet World* **2019**, *12*, 6, 796-801.
5. Milewski, S.; Sobiec, P. Effect of dietary supplementation with *Saccharomyces cerevisiae* dried yeast on milk yield, blood biochemical and haematological indices in ewes. *B Vet I Pulawy* **2009**, *53*, 753-758.
6. Ząbek, K.; Milewski, S.; Wójcik, R.; Siwicki, A.K. Effect of  $\beta$ -1, 3/1, 6-D-glucan in diet on productivity and humoral and cellular defense mechanisms in sheep. *Acta Vet Brno* **2013**, *82*, 141-146.
7. Zabek, K.; Milewski, S.; Wojcik, R.; Siwicki, A.K. The effects of supplementing diets fed to pregnant and lactating ewes with *Saccharomyces cerevisiae* dried yeast. *Turk J Vet Anim Sci* **2014**, *38*, 200-206.
8. Zaleska, B.; Milewski, S.; Ząbek, K. Impact of *Saccharomyces cerevisiae* supplementation on reproductive performance, milk yield in ewes and offspring growth. *Arch Anim Breed* **2015**, *58*, 79-83.
9. Gomes, L.C.; Alcalde, C.R.; de Macedo, F.D.F.; dos Santos, G.T.; Valloto, A.A.; de Lima, L.S.; Molina, B.S.D. Performance of lactating goats fed diets containing inactive dry yeast. *Rev Bras Zootec J Anim Sci* **2012**, *41*, 2249-2254.
10. de Lima, L.S.; Alcalde, C.R.; Freitas, H.S.; de Labio Molina, B.S.; Fonseca de Macedo, F.d.A.; Horst, J.A. Performance of dairy goats fed diets with dry yeast from sugar cane as protein source. *Rev Bras Zootec J Anim Sci* **2012**, *41*, 232-236.
11. Czech, A.; Grela, E.R.; Mokrzycka, A.; Pejsak, Z. Efficacy of mannanoligosaccharides additive to sows diets on colostrum, blood immunoglobulin content and production parameters of piglets. *Pol J Vet Sci* **2010**, *13*, 525-531.
12. Szuba-Trznadel, A.; Rzas, A.; Lira, R.; Fuchs, B. The influence of (1,3)-(1,6)-beta-D-glucan on the production results of sows and their offspring. *J Anim Feed Sci* **2014**, *23*, 228-235.
13. Graugnard, D.E.; Samuel, R.S.; Xiao, R.; Spangler, L.F.; Brennan, K.M. Intestinal gene expression profiles of piglets benefit from maternal supplementation with a yeast mannan-rich fraction during gestation and lactation. *Animal* **2015**, *9*, 622-628.



14. Duan, X.D.; Chen, D.W.; Zheng, P.; Tian, G.; Wang, J.P.; Mao, X.B.; Yu, J.; He, J.; Li, B.; Huang, Z.Q., et al. Effects of dietary mannan oligosaccharide supplementation on performance and immune response of sows and their offspring. *Anim Feed Sci Tech* **2016**, *218*, 17-25.
15. Wu, H.H.; Weng, B.B.C.; Chen, K.L.; Chiou, P.W.S.; Yu, B. Effect of dietary supplementation of beta-1,3-1,6-glucan on reproductive performance and immunity of New Zealand White does and their pups. *Livest Sci* **2011**, *135*, 70-75.
